# Supplementary material for: IonMonger: a free and fast planar perovskite solar cell simulator with coupled ion vacancy and charge carrier dynamics
Source: Springer Nature journal article supplement (doi:10.1007/s10825-019-01396-2), 2019-09-13
Supplement: MOESM1 [file 17171252]

# Supporting Information for “IonMonger: a free and fast planar perovskite solar cell simulator with coupled ion vacancy and charge carrier dynamics”

N. E. Courtier<sup>1,\*</sup>, J. M. Cave<sup>2</sup>, A. B. Walker<sup>2</sup>, G. Richardson<sup>1</sup>, and J. M. Foster<sup>3</sup>

<sup>1</sup>Mathematical Sciences, University of Southampton, Southampton, UK

<sup>2</sup>Department of Physics, University of Bath, Bath, UK

<sup>3</sup>School of Mathematics and Physics, University of Portsmouth, Portsmouth, UK

\*Corresponding author: N.E.Courtier@soton.ac.uk

This document contains five tables which contain: 1) the model variables, 2) the computational settings, 3) the dimensional input parameters, 4) the computed properties, and 5) the dimensionless parameters for the `IonMonger` code. This code is freely available (under an AGPL-3.0 copyleft license) on GitHub at <https://github.com/PerovskiteSCModelling/IonMonger>.

Table 1: Table of model variables.

| Symbol       | Description                | Unit                      |
|--------------|----------------------------|---------------------------|
| $n(x, t)$    | Electron concentration     | $\text{m}^{-3}$           |
| $p(x, t)$    | Hole concentration         | $\text{m}^{-3}$           |
| $P(x, t)$    | Iodide ion vacancy density | $\text{m}^{-3}$           |
| $\phi(x, t)$ | Electric potential         | V                         |
| $j^n(x, t)$  | Electron current density   | $\text{Am}^{-2}$          |
| $j^p(x, t)$  | Hole current density       | $\text{Am}^{-2}$          |
| $F^P(x, t)$  | Iodide ion vacancy flux    | $\text{m}^2\text{s}^{-1}$ |
| $E(x, t)$    | Electric field             | $\text{Vm}^{-1}$          |
| $V(t)$       | Applied voltage            | V                         |
| $J(t)$       | Total current density      | $\text{mAcm}^{-2}$        |

Table 2: Table of computational settings.

| Symbol            | Description                                                       |
|-------------------|-------------------------------------------------------------------|
| $N$               | Number of subintervals, with $N + 1$ as the number of grid points |
| <code>rtol</code> | Relative temporal tolerance for <code>ode15s</code> solver        |
| <code>atol</code> | Absolute temporal tolerance for <code>ode15s</code> solver        |

<sup>1</sup>Note that the effective doping densities ( $d_E$  and  $d_H$ ) should be chosen to be less than 20 times smaller than the effective DoS in each transport layer ( $g_c^E$  and  $g_c^H$ , respectively) for compatibility with the use of the Boltzmann approximation in the model.

Table 3: Table of input parameters, in which the abbreviation DoS denotes the density of states.

| Symbol                       | Description                                                                | Unit                         |
|------------------------------|----------------------------------------------------------------------------|------------------------------|
| $\varepsilon_0$              | Permittivity of free space                                                 | $\text{Fm}^{-1}$             |
| $q$                          | Elementary charge                                                          | C                            |
| $F_{ph}$                     | Incident photon flux at 1 Sun                                              | $\text{m}^{-2}\text{s}^{-1}$ |
| $k_B$                        | Boltzmann constant                                                         | $\text{eVK}^{-1}$            |
| $T$                          | Temperature                                                                | K                            |
| $I_s$                        | Intensity of incident light                                                | Suns                         |
| <b>Perovskite Properties</b> |                                                                            |                              |
| $\alpha$                     | Absorption coefficient                                                     | $\text{m}^{-1}$              |
| $b$                          | Width                                                                      | nm                           |
| $\varepsilon_A$              | Permittivity                                                               | $\varepsilon_0$              |
| $D_n$                        | Electron diffusion coefficient                                             | $\text{m}^2\text{s}^{-1}$    |
| $D_p$                        | Hole diffusion coefficient                                                 | $\text{m}^2\text{s}^{-1}$    |
| $E_C$                        | Conduction band minimum                                                    | eV                           |
| $E_V$                        | Valence band maximum                                                       | eV                           |
| $g_c$                        | Conduction band DoS                                                        | $\text{m}^{-3}$              |
| $g_v$                        | Valence band DoS                                                           | $\text{m}^{-3}$              |
| $D_I$                        | Iodide ion vacancy diffusion coefficient                                   | $\text{m}^2\text{s}^{-1}$    |
| $\hat{N}_0$                  | Mean density of ion vacancies                                              | $\text{m}^{-3}$              |
| $\beta$                      | Bimolecular rate constant                                                  | $\text{m}^3\text{s}^{-1}$    |
| $\tau_n$                     | Electron SRH pseudo-lifetime                                               | s                            |
| $\tau_p$                     | Hole SRH pseudo-lifetime                                                   | s                            |
| <b>Interface Properties</b>  |                                                                            |                              |
| $\beta^{E,H}$                | Bimolecular rate constant for interface indicated by superscript           | $\text{m}^3\text{s}^{-1}$    |
| $\nu_n^{E,H}$                | Electron recombination velocity towards interface indicated by superscript | $\text{ms}^{-1}$             |
| $\nu_p^{E,H}$                | Hole recombination velocity towards interface indicated by superscript     | $\text{ms}^{-1}$             |
| <b>ETL Properties</b>        |                                                                            |                              |
| $b_E$                        | Width                                                                      | nm                           |
| $d_E$                        | Effective doping density <sup>1</sup>                                      | $\text{m}^{-3}$              |
| $D_E$                        | Electron diffusion coefficient                                             | $\text{m}^2\text{s}^{-1}$    |
| $\varepsilon_E$              | Permittivity                                                               | $\varepsilon_0$              |
| $E_c^E$                      | Conduction band maximum                                                    | eV                           |
| $g_c^E$                      | Effective conduction band DoS                                              | $\text{m}^{-3}$              |
| <b>HTL Properties</b>        |                                                                            |                              |
| $b_H$                        | Width                                                                      | nm                           |
| $d_H$                        | Effective doping density <sup>1</sup>                                      | $\text{m}^{-3}$              |
| $D_H$                        | Hole diffusion coefficient                                                 | $\text{m}^2\text{s}^{-1}$    |
| $\varepsilon_H$              | Permittivity                                                               | $\varepsilon_0$              |
| $E_v^H$                      | Valence band minimum                                                       | eV                           |
| $g_v^H$                      | Effective valence band DoS                                                 | $\text{m}^{-3}$              |

Table 4: Table of computed properties.

| Symbol         | Description                                                | Unit                         |
|----------------|------------------------------------------------------------|------------------------------|
| $E_{f_E}$      | Fermi level in the ETL                                     | eV                           |
| $E_{f_H}$      | Fermi level in the HTL                                     | eV                           |
| $L_D$          | Perovskite Debye length                                    | nm                           |
| $G(x, t)$      | Photo-generation rate                                      | $\text{m}^{-3}\text{s}^{-1}$ |
| $G_0$          | Typical generation rate                                    | $\text{m}^{-3}\text{s}^{-1}$ |
| $n_0$          | Typical electron concentration in perovskite ( $k_E d_E$ ) | $\text{m}^{-3}$              |
| $p_0$          | Typical hole concentration in perovskite ( $k_H d_H$ )     | $\text{m}^{-3}$              |
| $R(x, t)$      | Bulk recombination rate                                    | $\text{m}^{-3}\text{s}^{-1}$ |
| $\bar{R}_l(t)$ | ETL/perovskite interface recombination flux                | $\text{m}^{-2}\text{s}^{-1}$ |
| $\bar{R}_r(t)$ | Perovskite/HTL interface recombination flux                | $\text{m}^{-2}\text{s}^{-1}$ |
| $\tau_{ion}$   | Characteristic timescale                                   | s                            |
| $V_{bi}$       | Built-in voltage                                           | V                            |
| $V_T$          | Thermal voltage                                            | mV                           |

Table 5: Table of dimensionless parameters.

| Symbol      | Definition                                                         | Description                                                                |
|-------------|--------------------------------------------------------------------|----------------------------------------------------------------------------|
| $\delta$    | $d_E/\hat{N}_0$                                                    | Ratio between the ETL doping and the ion vacancy densities                 |
| $\chi$      | $d_H/d_E$                                                          | Ratio between the HTL and ETL doping densities                             |
| $\sigma$    | $d_E/(G_0\tau_{ion})$                                              | Characteristic ratio between the timescales of electronic and ionic motion |
| $\kappa_p$  | $D_p d_H/(G_0 b^2)$                                                | Dimensionless hole diffusion coefficient in perovskite                     |
| $\kappa_n$  | $D_n d_E/(G_0 b^2)$                                                | Dimensionless electron diffusion coefficient in perovskite                 |
| $\kappa_E$  | $D_E \kappa_n / D_n$                                               | Dimensionless electron diffusion coefficient in ETL                        |
| $\kappa_H$  | $D_H \kappa_p / D_p$                                               | Dimensionless hole diffusion coefficient in HTL                            |
| $\lambda$   | $L_D/b$                                                            | Dimensionless (ionic) Debye length in perovskite                           |
| $\lambda_E$ | $\sqrt{\frac{\varepsilon_E \hat{N}_0}{\varepsilon_A d_E}} \lambda$ | Dimensionless Debye length in ETL                                          |
| $\lambda_H$ | $\sqrt{\frac{\varepsilon_H \hat{N}_0}{\varepsilon_A d_H}} \lambda$ | Dimensionless Debye length in HTL                                          |
| $\Phi$      | $V/V_T$                                                            | Dimensionless applied voltage                                              |
| $\Phi_{bi}$ | $V_{bi}/V_T$                                                       | Dimensionless built-in voltage                                             |
| $r_E$       | $\varepsilon_E/\varepsilon_A$                                      | Ratio between the ETL and perovskite permittivities                        |
| $r_H$       | $\varepsilon_H/\varepsilon_A$                                      | Ratio between the HTL and perovskite permittivities                        |
| $w_E$       | $b_E/b$                                                            | Dimensionless ETL width                                                    |
| $w_H$       | $b_H/b$                                                            | Dimensionless HTL width                                                    |
